# Supplementary material for: Long-term use of naldemedine in the treatment of opioid-induced constipation in patients with chronic noncancer pain: a randomized, double-blind, placebo-controlled phase 3 study
Source: PubMed Central journal article supplement — Pain. 2018 Feb 6;159(5):987–94. doi: 10.1097/j.pain.0000000000001174 (PMC5916485; doi:10.1097/j.pain.0000000000001174), 2018-02-06
Supplement: jop-159-987-s001.pdf [file jop-159-987-s001.pdf]

## SUPPLEMENTAL DIGITAL CONTENT

- Supplemental Digital Content 1. Table that lists the names of the Institutional Review Boards. docx
- Supplemental Digital Content 2. Table that summarizes the deaths occurring during the study period. docx

### Supplemental Digital Content 1. Institutional Review Boards.

| Location  | Institutional Review Board                                                                                                                                                                                                                                                                                                                                                      |
|-----------|---------------------------------------------------------------------------------------------------------------------------------------------------------------------------------------------------------------------------------------------------------------------------------------------------------------------------------------------------------------------------------|
| Australia | Hunter New England Research Ethics Committee<br>Research Ethics and Governance Unit, District Headquarters<br>Administration Building<br>Lookout Road<br>New Lambton, NSW 2305<br>Australia<br><br>Royal Adelaide Hospital Research Ethics Committee<br>Royal Adelaide Hospital<br>North Terrace<br>Adelaide SA 5000<br>Australia<br><br>Bellberry HREC<br>129 Glen Osmond Road |

|         |                                                                                                                                             |
|---------|---------------------------------------------------------------------------------------------------------------------------------------------|
|         | Eastwood, SA 5063<br>Australia                                                                                                              |
| Belgium | Commissie Medische Ethiek van<br>Universitaire Ziekenhuizen<br>KULeuven – Campus<br>Gasthuisberg<br>Herestraat 49<br>Leuven 3000<br>Belgium |
| Denmark | Den Videnskabsetiske Komite for<br>Region Syddanmark<br>Regionshuset<br>Damhaven 12<br>Vejle 7100<br>Denmark                                |
| Estonia | Tallinn Medical Research Ethics<br>Committee<br>Hiiu str. 42<br>Tallinn<br>Harjumaa 11619<br>Estonia                                        |
| France  | CPP TOURS – Region Centre –<br>Ouest 1<br>Hopital Bretonneau – CHRU                                                                         |

|              |                                                                                                                                              |
|--------------|----------------------------------------------------------------------------------------------------------------------------------------------|
|              | <p>TOURS – Batiment B1A<br/>2, Boulevard Tonnelle<br/>TOURS Cedax 9 37044<br/>France</p>                                                     |
| Germany      | <p>Ethikkommission der<br/>Landesärztekammer Thüringen<br/>Im Semmicht 33<br/>Jena<br/>Thüringen 07751<br/>Germany</p>                       |
| Hungary      | <p>Egeszsegugyi Tudományos<br/>Tanács Klinikai Farmakológiai<br/>Etkai Bizottsága<br/>Arany János u. 6-8<br/>Budapest H-1051<br/>Hungary</p> |
| Poland       | <p>Komisja Bioetyczna przy Śląskiej<br/>Izbie Lekarskiej w Katowicach<br/>ul. Grażyńskiego 49a<br/>Katowice 40-126<br/>Poland</p>            |
| South Africa | <p>University of the Witwatersrand<br/>Human Research Ethics Committee<br/>8 Blackwood Avenue</p>                                            |

|                |                                                                                                                                                                                                                                                                                                          |
|----------------|----------------------------------------------------------------------------------------------------------------------------------------------------------------------------------------------------------------------------------------------------------------------------------------------------------|
|                | <p>Parktown<br/> Johannesburg<br/> Gauteng 2193<br/> South Africa</p>                                                                                                                                                                                                                                    |
| Spain          | <p>CEIC Hospital Universitari de<br/> Girona Doctor Josep Trueta<br/> Avinguda de Franca s/n<br/> Girona 17007<br/> Spain</p> <p>CEIC – Consorci Sanitari Integral<br/> Hospital General De l-Hospitalet<br/> AV Joseph Molins, 29-41<br/> L'Hospitalet de Llobregat<br/> Barcelona 08906<br/> Spain</p> |
| Sweden         | <p>Regionala Etikprovningsnamnden<br/> i Stockholm<br/> Karolinska Institutet/Solna<br/> Nobels vag 9, plan D3<br/> Stockholm 171<br/> Sweden</p>                                                                                                                                                        |
| United Kingdom | <p>NRES Committee North West –<br/> Liverpool East<br/> North West Centre of Research</p>                                                                                                                                                                                                                |

|               |                                                                                                                                   |
|---------------|-----------------------------------------------------------------------------------------------------------------------------------|
|               | Ethics Committees<br>3rd Floor, Barlow House<br>4 Minshull Street<br>Manchester M1 3DZ<br>United Kingdom                          |
| United States | Schulman Associates Institutional<br>Review Board<br>4445 Lake Forest Drive<br>Suite 300<br>Cincinnati, OH 45242<br>United States |

**Supplemental Digital Content 2. Summary of all deaths during the study period  
(safety population).**

| <b>Treatment</b>   | <b>Sex</b> | <b>Age,<br/>years</b> | <b>Race</b> | <b>BMI,<br/>kg/m<sup>2</sup></b> | <b>Day of<br/>Death*</b> | <b>TEAE<sup>†</sup></b> | <b>Cause of Death</b>                           |
|--------------------|------------|-----------------------|-------------|----------------------------------|--------------------------|-------------------------|-------------------------------------------------|
| <b>Naldemedine</b> | Female     | 53                    | White       | 22.6                             | 350                      | No                      | Cerebrovascular<br>accident                     |
|                    | Female     | 58                    | White       | 37.3                             | 162                      | No                      | Acute<br>exacerbation of<br>COPD                |
|                    | Female     | 52                    | White       | 35.8                             | 169                      | No                      | Stage IV<br>pulmonary<br>adenocarcinoma         |
|                    | Male       | 49                    | White       | 27.7                             | 350                      | Yes                     | Myocardial<br>infarction related<br>to diabetes |
| <b>Placebo</b>     | Male       | 52                    | Black       | 28.1                             | 50                       | No                      | Accidental<br>overdose <sup>‡</sup>             |
|                    | Male       | 64                    | White       | 28.8                             | 28                       | Yes                     | Cardiac arrest                                  |

|  |        |    |       |      |     |     |                                             |
|--|--------|----|-------|------|-----|-----|---------------------------------------------|
|  | Female | 49 | White | 37.1 | 31  | Yes | Complications of<br>arteriosclerotic<br>CVD |
|  | Female | 78 | White | 38.1 | 179 | Yes | Cerebrovascular<br>accident                 |

\*Day of death since the start of treatment with the study drug.

†A death was not considered a TEAE if the patient died >14 days after their last visit and the bottles of pills were never returned for accountability.

‡Accidental overdose was of a noninvestigational product.

BMI, body mass index; COPD, chronic obstructive pulmonary disease; CVD, cardiovascular disease; TEAE, treatment-emergent adverse event.
